# Supplementary material for: Risk Factors for Dry Socket After Mandibular Third Molar Extraction: A Prospective Cohort Study
Source: Research Square preprint supplement (doi:10.21203/rs.3.rs-7749745/v1), 2025-10-30
Supplement: Supplementary file 1 [file fa8edf18c1345ab9b9fa3e45.docx]

**INFORMED CONSENT FORM**

**Participant Information Sheet**

**Study Title:** A Study on the Incidence and Contributing Factors of Dry Socket Following Mandibular Third Molar Extraction

**Principal Investigator at this Center:** Ziang Zhuo   **Department:** Department of Stomatology

**Version Number:** 1.0  **Version Date:** August 18, 2024

**Introduction:**

You are being invited to voluntarily participate in this clinical study. The following information explains the anticipated impacts, potential benefits, risks, and discomforts associated with your participation. Please read this document carefully and consider whether you wish to participate.

Your participation in this study is entirely voluntary. You may decide not to participate. After you have fully understood the basic content of this study and are satisfied with the information provided, please confirm your decision regarding participation. If there is anything you do not understand or if you would like additional information, please feel free to ask the study doctor any questions at any time. We will explain the information in an easily understandable manner. We encourage you to discuss your decision to participate fully with your family and friends before making a decision.

If you decide not to participate, you may choose alternative treatment options, and the treatment you receive will not be affected. Furthermore, even after you have agreed to participate, you may withdraw from the study at any time.

**1. Nature and Purpose of this Clinical Study**

Dry socket is one of the main complications following mandibular third molar extraction. Its specific etiology remains unclear but is associated with factors such as age, gender, duration of surgery, surgical difficulty, oral hygiene status, smoking history, and history of oral contraceptive use, among other medical histories. The reported incidence rate internationally ranges from approximately 5% to 30%, with some literature even reporting rates up to 60%. Preliminary statistics at our center indicate an incidence rate of approximately 1% to 2%. To further investigate the incidence of dry socket following mandibular third molar extraction, we are initiating this single-center, prospective, cross-sectional, descriptive study at our institution. This study involves no additional procedures or treatments beyond the extraction surgery itself. It solely involves the collection of pre-operative data (including medical history), oral hygiene status, imaging data, and the recording of intra-operative procedure duration.

**2. Planned Number of Participants in this Clinical Study**

Approximately 700 participants similar to you will participate in this study at this center.

**3. Eligibility for Participation in this Clinical Study**

**Inclusion Criteria are as follows:**

1. Meets the indications for extraction;
2. Age ≥ 18 years;
3. In good general health, able to tolerate the procedure;

**Exclusion Criteria: You cannot participate in the study if you meet ANY of the following criteria:**

1. Patients unwilling or unable to return for follow-up or participate in telephone interviews;
2. Women who were pregnant or breastfeeding;
3. Patients taking medications that may impair wound healing (e.g., immunosuppressants, steroids, bisphosphonates);
4. Presence of a cyst at the extraction site, considering curettage may cause additional trauma;

**4. Participant Rights and Relevant Precautions**

**4.1. Your Rights**

Your participation throughout the study is voluntary. If you decide not to participate in this study, it will not affect any other treatment you are entitled to receive. If you decide to participate, you will be asked to sign this written Informed Consent Form. You have the right to withdraw from the trial at any stage without facing discrimination or unfair treatment, and your corresponding medical treatment and rights will not be affected.

**4.2. Precautions**

As a participant, you are required to: Provide truthful information regarding your medical history and current physical condition; Inform the study doctor of any discomfort you experience during the course of this study; Refrain from taking medications, foods, etc., that the doctor has instructed you to avoid; Inform the study doctor if you have recently participated, or are currently participating, in any other research studies.

Please note: Patients must strictly adhere to the standard post-operative precautions for tooth extraction. There are no other restrictions.

**5. Clinical Study Procedures**

1. Pre-Screening Stage: Initial outpatient visit, confirmation of extraction indication, scheduling of elective surgery.
2. Screening Period: Exclusion of some cases based on the exclusion criteria.
3. Preparation Period: Adherence to pre-operative instructions (e.g., eat adequately, avoid staying up late, avoid menstruation period, arrive on time for surgery).
4. Treatment Period: Cooperation during the surgical procedure. Nursing staff will record the duration of the extraction surgery and intra-operative details.
5. Assessments at Each Follow-up:Telephone follow-up on post-operative day 1, 3, 5, and 7 to assess pain and swelling. If pain or swelling is severe, an outpatient visit will be arranged.
6. Discontinuation of Participation in this Clinical Study:

You may request to discontinue participation in this clinical study at any time without providing any reason, and your medical care will not be compromised as a result.

You may be withdrawn or the study may be ended early for you for any of the following reasons:

- 1. Side effects;
  2. Violation of study protocol (e.g., if you do not meet the inclusion criteria or fail to comply with study requirements);
  3. Loss to follow-up (if study staff are unable to contact you for required study visits);
  4. Your own request to withdraw;
  5. At the discretion of the investigator (e.g., the investigator may terminate the study at any time if it is judged to be in your best interest).

**6. Risks and Adverse Reactions for Participants in this Study**

This study involves no additional therapeutic procedures, medications, or trauma beyond the normal, necessary extraction procedure. It only involves the collection of pre-operative data (age, gender, medication history, smoking history), imaging data, and routine post-operative follow-up. Therefore, this study entails no additional adverse reactions beyond the normal post-operative responses and complications associated with tooth extraction.

**7. Potential Benefits of Participation:**

Analysis of your data will contribute to the diagnosis of conditions, provide necessary recommendations for your treatment, or offer valuable information for disease research.

We hope that the information obtained from your participation in this study will, in the future, benefit you or other patients with similar conditions.

1. If you indeed develop dry socket post-operatively, we will provide free treatment;
2. If you develop other post-operative complications, we agree to provide facilitated access to care;
3. Your participation will help us research the incidence rate of dry socket and identify its associated factors, allowing for their avoidance in future diagnoses and treatments, thereby reducing the incidence of dry socket, alleviating patient suffering, and also reducing the time and financial costs of medical care for the public.

**8. Alternative Treatment Options if You Do Not Participate in this Study**

Apart from participating in this study, you may receive conventional treatment provided by your doctor:

1. Not providing pre-operative information not routinely required for extraction;
2. Not wishing to undergo post-operative follow-up.

**9. Use of Research Results and Confidentiality of Personal Information**

During the research process, we will collect your medical history information, laboratory and imaging examination results, and follow-up information. To ensure privacy, we will code parts of your information. Your personal identifiers (such as name, date of birth, address) will be replaced by a code (a unique patient number) so that your identity cannot be determined by anyone. All data will be held by the Principal Investigator, stored at the Department of Stomatology of the Tenth People's Hospital, for a duration of 1 year, after which it will be destroyed.

With the understanding and assistance of you and other participants, the results of this study may be published in medical journals. However, we will keep your study records confidential as required by law, and your identity will not be disclosed. The personal information of study participants will be strictly protected and will not be disclosed unless required by relevant laws. When necessary, government regulatory authorities, the hospital Ethics Committee, and other relevant research personnel may inspect your data in accordance with regulations.

**10. Research-Related Costs and Compensation**

1. Costs of drugs/devices used in the study and related examinations

This study involves no additional therapeutic procedures, medications, or related costs beyond the routine extraction surgery.

1. Compensation for Participation
2. If you indeed develop dry socket post-operatively, we will provide free treatment;
3. If you develop other post-operative complications, we agree to provide facilitated access to care;

There is no other additional compensation.

**11. Who to Contact in Case of Questions or Difficulties**

If you have any questions related to this study, please contact Dr. Zhuo Ziang. During working hours, please call (021-66301722). During non-working hours, weekends, and holidays, please call 13671766483.

The Ethics Committee has reviewed and approved this study. If you have any questions related to your rights/benefits, or if you wish to report any difficulties, dissatisfaction, or concerns encountered during your participation in this study, or if you would like to provide feedback and suggestions related to the study, please contact: The Ethics Committee of Shanghai Tenth People's Hospital, Tel: 021-66301604.

**INFORMED CONSENT FORM**

**Signature Page**

I have been informed about the purpose, background, procedures, risks, and benefits of this research study. I have read this Informed Consent document and understand the study procedures, therapies, and objectives, as well as the potential benefits and risks of participation. This consent form is written in a language I am proficient in. I have had the opportunity to ask questions, and all my questions have been answered to my understanding.

I consent to the study doctor collecting and processing information about me, including my health information. I agree that information about me will be provided to the study doctor for scientific research.

I will comply with the study doctor's recommendations regarding the conduct of the study. However, I understand that I have the right to withdraw my voluntary consent to participate at any time without loss of benefits related to further medical care.

I understand that signing this consent form does not mean I waive any of my legal rights.

After signing this consent form, I will receive a copy. The original will be retained in the study center's files.

**Participant Signature:** _________________________ **Date:** _________________________

(Note: If the participant lacks legal capacity/has limited legal capacity, the legal guardian must sign and date)

**Legal Guardian Signature:** _________________________ **Date:** _________________________

(Note: If the participant is unable to read this Informed Consent Form, an impartial witness is required to attest that the investigator has explained all contents of the informed consent form to the participant. The impartial witness must sign and date)

**Impartial Witness Signature:** _________________________ **Date:** _________________________

**Investigator Signature:** _________________________ **Date:** _________________________

**QUESTIONNAIRE SURVEY**

| **Patient ID:** | |  |  |  |  |  |  |  |
| --- | --- | --- | --- | --- | --- | --- | --- | --- |
| Pre-op | Name： | | Gender: | | Age： | | Outpatient No.： | |
| Last Menstrual Period: | | CI: | | Classification: | | Medications: | |
| OP | Flap Elevation: | | odontosection: | | Osteotomy: | | Duration (min): | |
| Post-op | day1 | VAS： | | Sleep： | |  |  |  |
| day2 | VAS： | | Sleep： | |  |  |  |
| day5 | VAS： | |  |  |  |  |  |
| day7 | VAS： | |  |  |  |  |  |
| I voluntarily participate in this clinical study, have signed the Informed Consent Form, and commit to providing the above information truthfully. | | | | | | | | |
|  |  |  |  |  | Signature: Date: | | | |
